# Supplementary material for: Associations between Familial Rates of Psychiatric Disorders and De Novo Genetic Mutations in Autism
Source: Autism Res Treat. 2017 Nov 8;2017:9371964. doi: 10.1155/2017/9371964 (PMC5698792; doi:10.1155/2017/9371964)
Supplement: Supplementary file 1 — Supplemental Table 1: Genetic characterization for de novo Deletion Group (DEL). Supplemental Table 2: Genetic characterization for de novo Duplication Group (DUP). Supplemental Table 3: Genetic characterization for de novo Likely-Gene Disrupting Mutations (LGDM). [file 9371964.f1.xlsx]

## Sheet: SI Table1
Supplemental Table 1. Genetic characterization for de novo Deletion Group (DEL)
SSC Patient ID	Band	Chromosome	Start (hg18)	Stop (hg18)	Start (hg19)	Stop (hg19)	Size (BP)	Mechanism	Sex	Parent of origin	Location	Frequency	Rare (<= .1%)
11087.p1	22q11.22	chr22	21394287	21491674	23064287	23161674	97387	NAHR	Male	Unknown	Intergenic	2.71	N
11660.p1	9p21.1	chr9	30917196	30942603	30927196	30952603	25407	HR	Female	Not_stated	Intergenic	0.04	Y
11680.p1	16p11.2	chr16	29554843	30107306	29647342	30199805	552463	NAHR	Male	Mother	Exon	0.01	Y
11689.p1	Xq13.1	chrX	70296173	70329989	70379448	70413264	33816	HR	Male	Not_stated	Exon	0.06	Y
11714.p1	12p13.32	chr12	3526622	3538037	3656361	3667776	11415	HR	Male	Not_stated	Exon	0	Y
11798.p1	15q13.3	chr15	30238780	30544756	32451488	32757464	305976	HR	Male	Father	Exon	0.88	N
11800.p1	16q24.3	chr16	88326465	88334632	89798964	89807131	8167	NHR	Male	Mother	Exon	0.13	N
11919.p1	7p14.1	chr7	38260639	38302045	38294114	38335520	41406	HR	Male	Unknown	Exon	0.54	N
12100.p1	16p11.2	chr16	29531748	30107306	29624247	30199805	575558	NAHR	Male	Mother	Exon	0.01	Y
12119.p1	2p16.3	chr2	50683648	50727454	50830144	50873950	43806	NHR	Male	Not_stated	Exon	0.01	Y
12245.p1	22q11.22	chr22	21100917	21567586	22770917	23237586	466669	NHR	Female	Unknown	Exon	1.22	N
12308.p1	16p11.2	chr16	29554843	30123122	29647342	30215621	568279	NAHR	Female	Mother	Exon	0.01	Y
12336.p1	16q23.3	chr16	81796275	81830296	83238774	83272795	34021	NHR	Male	Father	Exon	0.02	Y
12339.p1	3q27.2	chr3	187095966	187210274	185613272	185727580	114308	NAHR	Male	Mother	Exon	0.19	N
12447.p1	20p12.1	chr20	14616243	14751454	14668243	14803454	135211	NHR	Male	Mother	Intron	0.35	N
12514.p1	22q11.22	chr22	21028552	21567586	22698552	23237586	539034	NHR	Male	Mother	Exon	1.56	N
12581.p1	9q34.3	chr9	139800353	140176299	140680532	141056478	375946	HR	Female	Father	Exon	0.05	Y
12691.p1	16q22.1-22.3	chr16	68567959	71494580	70010458	72937079	2926621	NAHR	Female	Mother	Exon	0	Y
12735.p1	2q12.1-13	chr2	103264154	108718935	103897722	109352503	5454781	NAHR	Male	Father	Exon	0	Y
12839.p1	16p13.11	chr16	15291358	16212856	15383857	16305355	921498	NAHR	Male	Father	Exon	0.03	Y
12957.p1	7q36.1	chr7	151633959	151686785	152003026	152055852	52826	HR	Female	Father	Exon	0.07	Y
12960.p1	19q13.42	chr19	60124341	60265445	55432529	55573633	141104	HR	Male	Mother	Exon	0.34	N
12975.p1	11q24.1	chr11	120769289	122402940	121264079	122897730	1633651	NHR	Male	Father	Exon	0.01	Y
12984.p1	16p13.3	chr16	3420220	3443739	3480219	3503738	23519	NHR	Male	Unknown	Exon	0.04	Y
13064.p1	3q29	chr3	197231795	198831368	195747398	197346971	1599573	NAHR	Male	Father	Exon	0	Y
13119.p1	22q13.31-13.33	chr22	46079990	49521414	47701326	51174548	3441424	NHR	Male	Father	Exon	0.01	Y
13131.p1	15q13.2	chr15	28287001	28385105	30499709	30597813	98104	HR	Male	Unknown	Intergenic	11.37	N
13200.p1	2p21	chr2	44299996	44396821	44446492	44543317	96825	HR	Male	Mother	Exon	0.04	Y
13288.p1	14q21.3	chr14	44353449	44588527	45283699	45518777	235078	HR	Male	Unknown	Exon	0.02	Y
13301.p1	15q13.2-13.3	chr15	28520129	30316380	30732837	32529088	1796251	NAHR	Male	Father	Exon	0.02	Y
13337.p1	20q12	chr20	40621732	40719457	41188318	41286043	97725	NHR	Male	Unknown	Intron	0.2	N
13350.p1	16p11.2	chr16	29563365	30107306	29655864	30199805	543941	NAHR	Male	Mother	Exon	0.01	Y
13416.p1	16p11.2	chr16	28730274	28950951	28822773	29043450	220677	NAHR	Male	Mother	Exon	0	Y
13443.p1	10q11.22	chr10	48983251	49044280	49313245	49374274	61029	HR	Male	Unknown	Exon	0.12	N
13481.p1	22q11.22	chr22	21441199	21567551	23111199	23237551	126352	NHR	Female	Unknown	Exon	3.24	N
13555.p1	17p12	chr17	14045669	15411904	14104944	15471179	1366235	NAHR	Female	Father	Exon	0.01	Y
13574.p1	9p23	chr9	11867833	11910016	11877833	11920016	42183	HR	Male	Father	Intergenic	0.86	N
13580.p1	2p16.3	chr2	51100798	51165036	51247294	51311532	64238	NHR	Male	Father	Exon	0.06	Y
13595.p1	2q23.1	chr2	148441815	148542250	148725345	148825780	100435	HR	Male	Father	Exon	0	Y
13666.p1	4q22.2	chr4	94263065	94310214	94044042	94091191	47149	NHR	Female	Unknown	Intron	0.06	Y
13674.p1	6q16.1	chr6	94610102	95326576	94553381	95269855	716474	NHR	Male	Mother	Intergenic	0.04	Y
13694.p1	12p12.1	chr12	25319229	25333097	25427962	25441830	13868	HR	Male	Father	Intergenic	0	Y
13726.p1	11q12.1-12.2	chr11	56595941	59977700	56839365	60221124	3381759	HR	Male	Father	Exon	0	Y
13754.p1	4p16.2	chr4	3404133	3420797	3434335	3450999	16664	NHR	Female	Unknown	Exon	0.33	N
13788.p1	16q22.1	chr16	68626853	68789182	70069352	70231681	162329	NAHR	Male	Father	Exon	0.83	N
13792.p1	7p14.1	chr7	38263670	38310481	38297145	38343956	46811	NHR	Male	Unknown	Exon	0.54	N
13815.p1	16q23.1	chr16	74804993	75073847	76247492	76516346	268854	NHR	Male	Mother	Exon	0.04	Y
13830.p1	3p14.1-14.2	chr3	60765447	66414269	60790407	66331579	5648822	NHR	Male	Father	Exon	0	Y
13862.p1	10p13	chr10	13994263	14028904	13954257	13988898	34641	NHR	Male	Father	Intron	0.02	Y
13866.p1	5q21.1	chr5	98795682	98854117	98767783	98826218	58435	HR	Male	Mother	Intergenic	0.31	N
13877.p1	3p12.1-12.3	chr3	77909751	84510664	77827061	84427974	6600913	NHR	Male	Father	Exon	0.06	Y
13962.p1	2p16.3	chr2	50644218	51109517	50790714	51256013	465299	NHR	Male	Mother	Exon	0.06	Y
14000.p1	16q24.1	chr16	83053990	83077897	84496489	84520396	23907	HR	Male	Mother	Exon	0.07	Y
14084.p1	17q25.1	chr17	70948479	72094821	73436884	74583226	1146342	NHR	Male	Mother	Exon	0.01	Y
14174.p1	4p16.1	chr4	9003188	9095149	9394090	9486051	91961	HR	Male	Father	Exon	1.94	N
14232.p1	22q13.31-13.33	chr22	46569262	49558258	48190598	51211392	2988996	NHR	Female	Father	Exon	0.01	Y
14240.p1	7p21.3	chr7	8746562	8804580	8780037	8838055	58018	NHR	Male	Mother	Exon	0.07	Y
14254.p1	9q21.11-21.13	chr9	71044684	75906257	71854864	76716437	4861573	NHR	Male	Father	Exon	0	Y
14270.p1	11p11.2	chr11	45906110	47067228	45949534	47110652	1161118	NHR	Female	Father	Exon	0	Y
14343.p1	3q13.2	chr3	114163555	114364557	112680865	112881867	201002	NHR	Male	Mother	Exon	0.01	Y
14358.p1	2q23.1	chr2	148467583	148540458	148751113	148823988	72875	HR	Male	Father	Prom	0	Y
14376.p1	9q12-21.13	chr9	69132975	77805517	69843155	78615697	8672542	NHR	Male	Mother	Exon	0	Y
14434.p1	22q11.22	chr22	21028250	21567586	22698250	23237586	539336	NHR	Male	Father	Exon	1.56	N
14475.p1	16q23.3	chr16	81718842	81795448	83161341	83237947	76606	NHR	Male	Mother	Exon	0.04	Y
14484.p1	7q11.23	chr7	74093383	76477408	74455447	76639472	2384025	NAHR	Male	Mother	Exon	0	Y
14534.p1	1p34.2	chr1	40753146	40771489	40980559	40998902	18343	HR	Male	Unknown	Exon	0.05	Y
14595.p1	3q29	chr3	197219312	198831368	195734915	197346971	1612056	NAHR	Male	Father	Exon	0	Y
14609.p1	6q25.3	chr6	156705742	157886709	156664050	157966721	1180967	NHR	Male	Mother	Exon	0.02	Y
14614.p1	19q13.2	chr19	45515811	45539684	40823971	40847844	23873	HR	Male	Unknown	Exon	0	Y
14616.p1	10q25.2-25.3	chr10	114363881	115220615	114373891	115230625	856734	NHR	Female	Father	Exon	0	Y
14643.p1	17q12	chr17	31889664	33338520	34815551	36264149	1448856	NAHR	Female	Father	Exon	0	Y
14656.p1	2q13	chr2	110214881	111108728	110857592	111392259	893847	NAHR	Female	Unknown	Exon	0.01	Y
14657.p1	11p15.2	chr11	13096813	13101386	13140237	13144810	4573	HR	Male	Father	Intergenic	0	Y
14693.p1	3p25.3-26.1	chr3	7578194	9736940	7603194	9761940	2158746	HR	Male	Father	Exon	0	Y

## Sheet: SI Table2
Supplemental Table 2. Genetic characterization for de novo Duplication Group (DUP)
SSC Patient ID	Band	Chromosome	Start (hg18)	Stop (hg18)	Start (hg19)	Stop (hg19)	Size (BP)	Mechanism	Sex	Parent of origin	Location	Frequency	Rare (<= .1%)
11532.p1	17p13.1-13.2	chr17	6058839	7267958	6118115	7327234	1209119	HR	Male	Father	Exon	0	Y
11718.p1	10q26.11	chr10	120748083	120937654	120758093	120947664	189571	HR	Male	Mother	Exon	0.02	Y
11928.p1	15q13.2-13.3	chr15	28723577	30303265	30936285	32515973	1579688	NAHR	Female	Mother	Exon	0.1	Y
11982.p1	17q21.32	chr17	42135186	42476630	44780004	45121631	341444	NAHR	Male	Not_stated	Exon	0.07	Y
12007.p1	15q11.1-13.1	chr15	18275409	26728046	20015396	28929005	8452637	NAHR	Female	Mother	Exon	0.02	Y
12134.p1	7q11.23	chr7	73616737	74126711	73978801	74488775	509974	HR	Male	Father	Exon	0.03	Y
12163.p1	1p11.2-12	chr1	119093336	121058630	119291813	121357107	1965294	NHR	Male	Father	Exon	0	Y
12198.p1	4q35.2	chr4	191019867	191164126	190782873	190927132	144259	HR	Male	Unknown	Exon	0.18	N
12330.p1	1q43	chr1	238598628	240968200	240532005	242901577	2369572	HR	Male	Father	Exon	0.01	Y
12343.p1	13q14.11	chr13	40002610	40810340	41104610	41912340	807730	HR	Female	Father	Exon	0	Y
12370.p1	9q34.13	chr9	133779666	133924807	134789845	134934986	145141	NHR	Male	Father	Exon	0.02	Y
12412.p1	XXY	chrX	1	154900000	60001	155246806	154899999	Meiotic_Nondisjunction	Female	Unknown	Exon	0	Y
12420.p1	1q21.1	chr1	144612035	147355702	145900678	149089078	2743667	NAHR	Male	Father	Exon	0.02	Y
12435.p1	16p11.2	chr16	29510994	30107306	29603493	30199805	596312	NAHR	Male	Unknown	Exon	0.01	Y
12485.p1	11q14.1	chr11	84231213	84264089	84553565	84586441	32876	HR	Male	Not_stated	Intron	0.13	N
12594.p1	7q11.23	chr7	72360917	73782113	72722981	74144177	1421196	NAHR	Female	Father	Exon	0	Y
12647.p1	16p11.2	chr16	29563365	30130862	29655864	30223361	567497	NAHR	Male	Mother	Exon	0.01	Y
12736.p1	16p11.2	chr16	29563365	30107306	29655864	30199805	543941	NAHR	Male	Mother	Exon	0.01	Y
12803.p1	1q21.1	chr1	144933825	146336720	146467203	147870096	1402895	NAHR	Male	Father	Exon	0.02	Y
12860.p1	XXY	chrX	1	154900000	60001	155246806	154899999	Meiotic_Nondisjunction	Female	Unknown	Exon	0	Y
12907.p1	1q21.1	chr1	144482933	146324832	145771576	147858208	1841899	NAHR	Male	Father	Exon	0.02	Y
12955.p1	7q11.23	chr7	72411506	73782113	72773570	74144177	1370607	NAHR	Male	Mother	Exon	0	Y
13036.p1	6p11.2-6q11.1	chr6	57436972	62748639	57329013	62690680	5311667	NAHR	Male	Mother	Exon	0	Y
13274.p1	12q23.3	chr12	102807336	102829111	104283206	104304981	21775	HR	Female	Mother	Intergenic	0	Y
13335.p1	16p11.2	chr16	29554843	30102549	29647342	30195048	547706	NAHR	Female	Mother	Exon	0.01	Y
13355.p1	15q12	chr15	24522927	25131566	26971834	27548820	608639	NHR	Male	Father	Exon	0.01	Y
13362.p1	2q33.1	chr2	201785316	201839832	202077071	202131587	54516	HR	Male	Mother	Exon	0	Y
13367.p1	4p16.2-16.3	chr4	35410	3511385	45410	3541587	3475975	NHR	Female	Mother	Exon	0.01	Y
13465.p1	15q26.2	chr15	94346766	94421242	96545762	96620238	74476	NHR	Male	Father	Intergenic	0	Y
13478.p1	6q24.1	chr6	141252704	141343302	141211011	141301609	90598	HR	Male	Mother	Intergenic	0.08	Y
13491.p1	16p11.2	chr16	29499858	30130862	29592357	30223361	631004	NAHR	Male	Mother	Exon	0.01	Y
13493.p1	2p16.2	chr2	52938002	53082210	53084498	53228706	144208	NHR	Male	Father	Intergenic	0.21	N
13510.p1	2q13	chr2	111102702	112816485	111386233	113100014	1713783	NAHR	Male	Father	Exon	0	Y
13534.p1	XYY	chrY	1	57700000	10001	59290612	57699999	Meiotic_Nondisjunction	Male	Father	Exon	0.01	Y
13561.p1	17p11.2-12	chr17	15820635	17865172	15879910	17924447	2044537	NAHR	Female	Father	Exon	0.01	Y
13589.p1	14q32.33	chr14	103936116	104037459	104865071	104966414	101343	HR	Male	Father	Intergenic	0.11	N
13638.p1	16q24.2	chr16	86374093	86542098	87816592	87984597	168005	NHR	Female	Unknown	Exon	0.09	Y
13706.p1	XYY	chrY	1	57700000	10001	59290612	57699999	Meiotic_Nondisjunction	Male	Father	Exon	0.01	Y
13727.p1	9q22.31-22.32	chr9	93456890	95913870	94417069	96874049	2456980	HR	Male	Father	Exon	0	Y
13759.p1	17q25.3	chr17	78289911	78401868	80696622	80808579	111957	NHR	Male	Father	Exon	0.06	Y
13769.p1	16q22.1-22.3	chr16	68880627	69801776	70323126	71244275	921149	HR	Male	Mother	Exon	0	Y
13871.p1	1q31.3	chr1	195089923	195154080	196823300	196887457	64157	NAHR	Male	Unknown	Exon	3.86	N
13876.p1	8p11.1-8q11.22	chr8	35979227	50597786	35859685	50435233	14618559	NAHR	Male	Mother	Exon	0	Y
13975.p1	1q21.1	chr1	144800611	146268315	146089254	147801691	1467704	NAHR	Male	Mother	Exon	0.02	Y
13995.p1	1q44	chr1	246078721	246223672	248012098	248157049	144951	HR	Male	Father	Exon	0.11	N
14023.p1	16p11.2	chr16	29489265	30123122	29581764	30215621	633857	NAHR	Male	Mother	Exon	0.01	Y
14032.p1	7q11.23	chr7	74093383	76112888	74455447	76274952	2019505	NAHR	Male	Mother	Exon	0	Y
14100.p1	XYY	chrY	1	57700000	10001	59290612	57699999	Meiotic_Nondisjunction	Male	Father	Exon	0.01	Y
14159.p1	15q11.2-13.1	chr15	21235224	26144736	23683783	28471141	4909512	NAHR	Male	Father	Exon	0	Y
14259.p1	22q11.21	chr22	17266915	20141991	18886915	21811991	2875076	NAHR	Male	Mother	Exon	0.01	Y
14326.p1	1p35.3	chr1	28171538	28241866	28298951	28369279	70328	HR	Male	Father	Exon	0.04	Y
14330.p1	22q11.21	chr22	17254965	19794479	18874965	21464479	2539514	NAHR	Female	Mother	Exon	0.01	Y
14443.p1	15q26.3	chr15	97298074	97819838	99480551	100002315	521764	NHR	Male	Mother	Exon	0.04	Y
14459.p1	19q13.42	chr19	60226510	60248071	55534698	55556259	21561	HR	Male	Mother	Exon	0.34	N
14472.p1	12q21.1	chr12	71150892	71241959	72864625	72955692	91067	NHR	Male	Mother	Exon	0.05	Y
14478.p1	5q31.2	chr5	137470252	138164853	137442353	138136954	694601	HR	Male	Father	Exon	0	Y
14513.p1	19q13.42-13.43	chr19	60169295	62349624	55477483	57657812	2180329	HR	Male	Mother	Exon	0	Y
14532.p1	5p13.2	chr5	36016232	38197615	35980475	38161858	2181383	HR	Male	Father	Exon	0	Y
14556.p1	19p12	chr19	20867601	20944207	21075761	21152367	76606	NHR	Male	Unknown	Exon	0.03	Y
14599.p1	1q21.1	chr1	144800611	146377870	146089254	147911246	1577259	NAHR	Male	Father	Exon	0.02	Y
14634.p1	15q11.2-13.1	chr15	20301669	26849239	22750305	29050198	6547570	NAHR	Male	Mother	Exon	0	Y
14638.p1	16p12.1	chr16	24635444	27336807	24727943	27429306	2701363	HR	Male	Father	Exon	0	Y

## Sheet: SI Table3
Supplemental Table 3. Genetic characterization for de novo Likely-Gene Disrupting Mutations (LGDM)
SSC Patient ID	Gene	Chromosome	Start (hg19)	Type	Sex	Accession	Loss of function effect	AA change	BP change
11042.p1	DSG3	18	29055782	Indel	Female	NM_001944	frameshift	F853+!	2559+A
11074.p1	MAP3K14	17	43342072	Indel	Female	NM_003954	frameshift	925-!	2774+C
11132.p1	BTN1A1	6	26508728	SNV	Female	NM_001732	3splice	NA	NA
11145.p1	KMT2A	11	118344386	Indel	Female	NM_005933	frameshift	838-!	2512+G
11290.p1	OR4C11	11	55371381	SNV	Female	NM_001004700	nonsense	Q157X	C469T
11480.p1	TBR1	2	162273322	Indel	Female	NM_006593	frameshift	134-!	401+C
11518.p1	GPRIN1	5	176026121	Indel	Female	NM_052899	frameshift	239-!	715+TCCTGGGTCTTTG
11609.p1	UPF3B	X	118985815	Indel	Female	NM_080632	frameshift	P60+!	179+T
11616.p1	OR2T10	1	248756275	SNV	Female	NM_001004693	nonsense	Y265X	C795A
11654.p1	CHD8	14	21871373	SNV	Male	NM_001170629	3splice	NA	NA
11685.p1	COL6A6	3	130345392	SNV	Female	NM_001102608	5splice	NA	NA
11691.p1	GRIN2B	12	14019043	Indel	Female	NM_000834	frameshift	S34+!	101+C
11707.p1	PDCD1	2	242795103	Indel	Female	NM_005018	frameshift	36-!	106+C
11715.p1	ASAH2	10	52005130	Indel	Female	NM_019893	frameshift	Q71+!	213+C
11731.p1	OSBPL8	12	76793728	Indel	Female	NM_020841	frameshift	131-!	393+GAAGA
11776.p1	MFSD3	8	145735146	Indel	Female	NM_138431	frameshift	K144+!	430+AGCTGGGGGCCGCGCT
11782.p1	TRPM3	9	73151650	Indel	Male	NM_001007471	frameshift	1448-!	4343+AC
11808.p1	NFKBIL1	6	31525439	Indel	Male	NM_005007	frameshift	R123+!	369+TG
11838.p1	KLHDC10	7	129767258	SNV	Female	NM_014997	nonsense	R316X	C946T
11842.p1	PSD3	8	18730164	Indel	Female	NM_015310	frameshift	70-!	210+G
11872.p1	KATNAL2	18	44603833	SNV	Male	NM_031303	5splice	NA	NA
11892.p1	SCN2A	2	166201379	SNV	Female	NM_001040142	nonsense	C959X	C2877A
11909.p1	IFI30	19	18288571	SNV	Female	NM_006332	nonsense	Y229X	C687G
11925.p1	SKIDA1	10	21805727	Indel	Female	NM_207371	frameshift	342-!	1025+C
11940.p1	HIVEP3	1	42048715	Indel	Male	NM_001127714	frameshift	R585+!	1755+C
11986.p1	MPP6	7	24720140	Indel	Female	NM_016447	5splice	NA	NA
12044.p1	WDFY3	4	85715777	SNV	Female	NM_014991	nonsense	R1128X	C3382T
12056.p1	RNF38	9	36375929	SNV	Female	NM_194328	5splice	NA	NA
12066.p1	CPD	17	28770924	SNV	Female	NM_001304	nonsense	Y826X	C2478G
12070.p1	ZNF598	16	2051648	SNV	Female	NM_178167	nonsense	R317X	C949T
12087.p1	VAV3	1	108303413	Indel	Female	NM_006113	frameshift	337-!	1010+C
12090.p1	TCF7L2	10	114910883	SNV	Male	NM_030756	5splice	NA	NA
12093.p1	DOT1L	19	2214494	SNV	Female	NM_032482	nonsense	Q608X	C1822T
12099.p1	DYRK1A	21	38845116	Indel	Female	NM_130438	frameshift	47-!	141+AT
12108.p1	KAT6A	8	41906209	Indel	Female	NM_001099412	frameshift	96-!	287+CAAA
12130.p1	ADNP	20	49510027	Indel	Male	NM_001282532	frameshift	408-!	1224+AA
12161.p1	CARKD	13	111290774	SNV	Male	NM_001242881	nonsense	Q315X	C943T
12197.p1	SPINK5	5	147506589	Indel	Female	NM_001127698	frameshift	1001-!	3001+C
12211.p1	CTNNB1	3	41275346	SNV	Male	NM_001098209	nonsense	W504X	G1512A
12219.p1	COL5A3	19	10091481	SNV	Female	NM_015719	5splice	NA	NA
12221.p1	FAM91A1	8	124787443	SNV	Female	NM_144963	nonsense	R72X	C214T
12246.p1	AFM	4	74357772	SNV	Female	NM_001133	nonsense	R343X	C1027T
12260.p1	USP45	6	99893695	SNV	Female	NM_001080481	nonsense	Y651X	C1953A
12300.p1	SLC7A7	14	23243580	SNV	Female	NM_001126105	nonsense	R410X	C1228T
12311.p1	DNMT3A	2	25505356	Indel	Female	NM_175629	frameshift	G135+!	403+A
12323.p1	PHF2	9	96439929	Indel	Female	NM_005392	frameshift	1088-!	3262+T
12329.p1	DSCAM	21	41457527	SNV	Female	NM_001271534	5splice	NA	NA
12340.p1	PPM1D	17	58740376	SNV	Male	NM_003620	nonsense	W427X	G1281A
12346.p1	MBD5	2	149225965	Indel	Female	NM_018328	frameshift	151-!	453+TC
12409.p1	LRP2	2	170042308	SNV	Female	NM_004525	nonsense	R3184X	C9550T
12418.p1	KDM5B	1	202705466	SNV	Female	NM_006618	nonsense	R1047X	C3139T
12444.p1	CNOT3	19	54656675	Indel	Male	NM_014516	frameshift	659-!	1976+TG
12463.p1	UNC80	2	210745771	SNV	Female	NM_032504	nonsense	R1357X	C4069T
12473.p1	MOV10	1	113241092	Indel	Female	NM_001130079	frameshift	834-!	2500+G
12501.p1	NRXN1	2	50724605	SNV	Female	NM_001135659	nonsense	Y955X	T2865A
12507.p1	ANKRD11	16	89350771	Indel	Female	NM_001256183	frameshift	727-!	2179+CAAA
12547.p1	GRIN2B	12	13764762	SNV	Female	NM_000834	nonsense	W559X	G1677A
12563.p1	CCPG1	15	55651891	SNV	Female	NM_001204450	nonsense	Q694X	C2080T
12565.p1	SETD2	3	47098932	Indel	Male	NM_014159	frameshift	2114-!	6342+A
12600.p1	ZC3H4	19	47584867	Indel	Female	NM_015168	frameshift	448-!	1343+T
12610.p1	BRCA1	17	41197776	SNV	Female	NM_007300	nonsense	W1858X	G5574A
12611.p1	SPAST	2	32339776	Indel	Female	NM_014946	frameshift	T251+!	752+A
12617.p1	STARD9	15	42967936	SNV	Male	NM_020759	nonsense	R588X	C1762T
12619.p1	FER1L5	2	97368053	SNV	Female	NM_001113382	nonsense	R1760X	C5278T
12622.p1	CDAN1	15	43020870	Indel	Female	NM_138477	frameshift	928-!	2784+A
12642.p1	CIC	19	42792016	SNV	Female	NM_015125	nonsense	R274X	C820T
12652.p1	SPATA13	13	24797447	Indel	Female	NM_001286792	frameshift	189-!	566+C
12653.p1	DLL1	6	170593075	Indel	Female	NM_005618	frameshift	C431+!	1293+T
12673.p1	TNRC6B	22	40661586	Indel	Female	NM_001162501	frameshift	451-!	1352+AGAG
12681.p1	GRIN2B	12	13722953	SNV	Male	NM_000834	3splice	NA	NA
12685.p1	FAM8A1	6	17606162	SNV	Female	NM_016255	nonsense	R339X	C1015T
12692.p1	OR52M1	11	4566664	SNV	Female	NM_001004137	nonsense	K82X	A244T
12703.p1	RAI1	17	17699836	Indel	Female	NM_030665	frameshift	1192-!	3574+G
12705.p1	DIP2C	10	428608	Indel	Female	NM_014974	frameshift	A657+!	1971+G
12728.p1	KIF21A	12	39763593	Indel	Female	NM_001173465	frameshift	H130+!	389+A
12752.p1	ETFB	19	51848515	SNV	Male	NM_001014763	nonsense	E331X	G991T
12763.p1	SUFU	10	104263992	SNV	Female	NM_001178133	nonsense	S28X	C83A
12764.p1	NCKAP1	2	183791570	SNV	Male	NM_205842	nonsense	E1088X	G3262T
12773.p1	PCDHA13	5	140263886	Indel	Female	NM_018904	frameshift	678-!	2033+TTCG
12792.p1	ANO5	11	22276997	SNV	Female	NM_213599	nonsense	Q421X	C1261T
12817.p1	FOXP1	3	71050170	Indel	Female	NM_001244815	frameshift	A341+!	1022+A
12826.p1	TROVE2	1	193045125	Indel	Male	NM_004600	frameshift	252-!	756+TTAG
12840.p1	TM4SF19	3	196053904	SNV	Female	NM_001204897	3splice	NA	NA
12843.p1	TYW5	2	200797909	SNV	Female	NM_001039693	nonsense	Q277X	C829T
12854.p1	CC2D1A	19	14031646	SNV	Female	NM_017721	nonsense	E518X	G1552T
12858.p1	PAX5	9	37015070	Indel	Male	NM_001280550	frameshift	112-!	334+C
12864.p1	SUV420H1	11	67938481	SNV	Male	NM_017635	5splice	NA	NA
12867.p1	TRIP12	2	230701696	SNV	Male	NM_001284214	nonsense	R380X	C1138T
12939.p1	SLC25A39	17	42399123	Indel	Female	NM_001143780	frameshift	113-!	337+TG
12948.p1	MSL2	3	135871025	Indel	Male	NM_018133	frameshift	233-!	698+TCTG
12950.p1	UBN2	7	138968839	Indel	Female	NM_173569	frameshift	1063-!	3188+CTCT
12952.p1	KMT2E	7	104748100	Indel	Female	NM_018682	frameshift	1066-!	3196+C
12969.p1	MED13L	12	116418553	Indel	Female	NM_015335	3splice	NA	NA
12991.p1	CHD8	14	21861643	Indel	Female	NM_001170629	frameshift	2104-!	6311+GAAG
13000.p1	MYH10	17	8424204	Indel	Female	NM_001256012	frameshift	755-!	2265+T
13009.p1	ZFP2	5	178359410	SNV	Female	NM_030613	nonsense	R366X	C1096T
13010.p1	TBC1D23	3	100015120	SNV	Female	NM_001199198	5splice	NA	NA
13012.p1	DIP2A	21	47958429	Indel	Female	NM_206889	frameshift	H612+!	1835+CTGGTCT
13042.p1	THSD7A	7	11487022	SNV	Female	NM_015204	nonsense	Q879X	C2635T
13047.p1	GOLGA5	14	93286182	SNV	Female	NM_005113	5splice	NA	NA
13054.p1	USP29	19	57641996	Indel	Female	NM_020903	frameshift	651-!	1953+A
13060.p1	NACC1	19	13246969	SNV	Female	NM_052876	5splice	NA	NA
13069.p1	TCF7L2	10	114901076	SNV	Female	NM_001198527	5splice	NA	NA
13070.p1	CTTNBP2	7	117423007	Indel	Female	NM_033427	frameshift	761-!	2281+TG
13073.p1	SYNGAP1	6	33408650	Indel	Female	NM_006772	frameshift	607-!	1821+TT
13092.p1	LMTK3	19	49004780	Indel	Female	NM_001080434	frameshift	T308+!	922+CTGACCT
13094.p1	WDFY3	4	85719152	SNV	Female	NM_014991	nonsense	R978X	A2932T
13096.p1	GIMAP8	7	150164231	Indel	Female	NM_175571	frameshift	149-!	445+A
13097.p1	ARHGAP5	14	32561337	SNV	Female	NM_001173	nonsense	E488X	G1462T
13106.p1	DIP2A	21	47957426	SNV	Female	NM_015151	nonsense	W592X	G1775A
13125.p1	RAD21L1	20	1210539	SNV	Female	NM_001136566	nonsense	R54X	C160T
13128.p1	EPHB2	1	23236941	SNV	Male	NM_004442	nonsense	Q858X	C2572T
13135.p1	S100G	X	16672582	SNV	Female	NM_004057	nonsense	E64X	G190T
13147.p1	SORBS1	10	97098949	Indel	Female	NM_001034955	frameshift	958-!	2872+TG
13162.p1	RIMS1	6	72889391	Indel	Female	NM_014989	frameshift	D195+!	585+A
13168.p1	MFRP	11	119214624	Indel	Male	NM_031433	frameshift	342-!	1026+A
13176.p1	ZFYVE26	14	68272014	Indel	Male	NM_015346	frameshift	397-!	1191+G
13183.p1	NIN	14	51223326	Indel	Female	NM_182946	frameshift	1474-!	4422+AT
13190.p1	SMAP2	1	40875459	SNV	Male	NM_022733	nonsense	Y118X	T354A
13197.p1	NR3C2	4	149073677	SNV	Female	NM_000901	nonsense	S818X	C2453A
13199.p1	PLCD4	2	219501023	Indel	Male	NM_032726	frameshift	A697+!	2090+CATG
13222.p1	RPS6KA3	X	20193403	SNV	Male	NM_004586	nonsense	S369X	C1106G
13234.p1	CBX4	17	77809050	SNV	Female	NM_003655	nonsense	Q131X	C391T
13254.p1	CMPK2	2	6990025	SNV	Female	NM_207315	nonsense	Q436X	C1306T
13256.p1	IL17RA	22	17590329	Indel	Female	NM_014339	frameshift	740-!	2220+C
13289.p1	MLANA	9	5892550	SNV	Female	NM_005511	nonsense	E26X	G76T
13333.p1	POLRMT	19	630058	SNV	Female	NM_005035	nonsense	Q102X	C304T
13344.p1	NOTCH1	9	139396487	SNV	Female	NM_017617	nonsense	W1813X	G5438A
13349.p1	NUAK1	12	106461269	SNV	Female	NM_014840	nonsense	Q433X	C1297T
13359.p1	PFKL	21	45742909	Indel	Female	NM_001002021	frameshift	L542+!	1624+T
13364.p1	ECM2	9	95277357	SNV	Female	NM_001393	nonsense	R204X	C610T
13382.p1	IRF2BPL	14	77492033	Indel	Female	NM_024496	frameshift	701-!	2103+A
13398.p1	POGZ	1	151377903	Indel	Female	NM_015100	frameshift	E1203+!	3609+TGATGACG
13439.p1	CSTF2T	10	53458249	Indel	Female	NM_015235	frameshift	Y354+!	1062+T
13447.p1	ARID1B	6	157527664	Indel	Male	NM_020732	frameshift	1797-!	5389+TGTT
13471.p1	FLG	1	152286919	Indel	Female	NM_002016	frameshift	148-!	443+AG
13497.p1	RIMS1	6	73102488	Indel	Female	NM_014989	frameshift	Q1532+!	4594+A
13504.p1	GRAMD2	15	72461298	Indel	Female	NM_001012642	frameshift	K59+!	175+A
13506.p1	SCUBE2	11	9111272	SNV	Female	NM_001170690	nonsense	E80X	G238T
13513.p1	ZMYND11	10	293337	SNV	Female	NM_001202468	3splice	NA	NA
13526.p1	CACNA2D3	3	54921984	SNV	Female	NM_018398	3splice	NA	NA
13545.p1	ADNP	20	49509094	Indel	Female	NM_001282531	frameshift	E720+!	2158+A
13548.p1	GALNT18	11	11314689	Indel	Male	NM_198516	frameshift	522-!	1564+C
13552.p1	DYRK1A	21	38877833	Indel	Female	NM_130438	frameshift	496-!	1487+C
13582.p1	DSCAML1	11	117301436	SNV	Female	NM_020693	5splice	NA	NA
13585.p1	ACACB	12	109577549	Indel	Female	NM_001093	frameshift	P113+!	339+G
13586.p1	TRIM17	1	228596934	Indel	Female	NM_016102	frameshift	T275+!	823+C
13590.p1	EFCAB5	17	28400678	Indel	Female	NM_001145053	frameshift	847-!	2541+T
13602.p1	SDCCAG3	9	139304579	Indel	Female	NM_001039707	frameshift	V62+!	184+A
13606.p1	CDC42BPB	14	103434646	SNV	Female	NM_006035	nonsense	R764X	C2290T
13608.p1	CSDE1	1	115280664	SNV	Male	NM_001242891	nonsense	R123X	C367T
13612.p1	DST	6	56393643	Indel	Female	NM_001144769	frameshift	3773-!	11319+AAAC
13614.p1	CHD2	15	93563244	SNV	Female	NM_001271	nonsense	R1637X	C4909T
13616.p1	ATP10D	4	47571000	Indel	Female	NM_020453	frameshift	T1000+!	3000+G
13621.p1	MDN1	6	90489930	SNV	Male	NM_014611	5splice	NA	NA
13627.p1	POGZ	1	151378489	SNV	Female	NM_015100	nonsense	R1008X	C3022T
13630.p1	MEMO1	2	32168370	SNV	Female	NM_001137602	5splice	NA	NA
13634.p1	BAI1	8	143605599	SNV	Female	NM_001702	nonsense	Y1082X	C3246G
13664.p1	KDM5B	1	202698172	SNV	Female	NM_006618	nonsense	R1543X	C4627T
13670.p1	NFIA	1	61553905	SNV	Male	NM_001145512	nonsense	R83X	C247T
13672.p1	URB1	21	33757868	SNV	Female	NM_014825	nonsense	R90X	C268T
13678.p1	ASH1L	1	155340680	SNV	Female	NM_018489	nonsense	E2143X	G6427T
13688.p1	RNF146	6	127607886	Indel	Female	NM_001242850	frameshift	43-!	128+AT
13691.p1	PCSK2	20	17434474	Indel	Female	NM_002594	frameshift	325-!	973+G
13695.p1	AHDC1	1	27876868	Indel	Female	NM_001029882	frameshift	R587+!	1760+A
13697.p1	JAKMIP1	4	6064158	SNV	Female	NM_001099433	nonsense	R481X	C1441T
13702.p1	ACOX2	3	58491004	Indel	Female	NM_003500	frameshift	665-!	1993+T
13710.p1	SLC38A3	3	50256056	SNV	Female	NM_006841	nonsense	Y356X	C1068G
13711.p1	HECTD1	14	31613330	Indel	Female	NM_015382	frameshift	T922+!	2766+A
13735.p1	DSCAM	21	41414330	Indel	Female	NM_001389	frameshift	M1885+!	5655+A
13739.p1	L1CAM	X	153135038	Indel	Male	NM_000425	frameshift	402-!	1204+TG
13768.p1	ANK2	4	114277599	Indel	Female	NM_001148	frameshift	2609-!	7825+G
13771.p1	IFNA10	9	21207037	SNV	Female	NM_002171	nonsense	C20X	T60A
13796.p1	TBR1	2	162275481	Indel	Male	NM_006593	frameshift	T350+!	1048+C
13799.p1	SLC6A8	X	152958717	SNV	Male	NM_001142806	3splice	NA	NA
13809.p1	CDC23	5	137534408	Indel	Female	NM_004661	frameshift	240-!	718+CA
13813.p1	MED13	17	60108956	Indel	Male	NM_005121	frameshift	286-!	858+C
13818.p1	CHD2	15	93563282	Indel	Female	NM_001271	frameshift	G1649+!	4947+G
13829.p1	CTNNA3	10	68535201	SNV	Male	NM_013266	5splice	NA	NA
13839.p1	NUDT17	1	145589354	Indel	Female	NM_001012758	frameshift	G25+!	75+TG
13849.p1	KLB	4	39409045	Indel	Female	NM_175737	frameshift	F159+!	476+C
13851.p1	SUCLG2	3	67578618	SNV	Female	NM_001177599	nonsense	Q119X	C355T
13857.p1	SRCAP	16	30745033	Indel	Male	NM_006662	frameshift	2136-!	6408+GACAGCGACTG
13882.p1	NF1	17	29559852	SNV	Female	NM_000267	nonsense	S1150X	C3449G
13890.p1	DYRK1A	21	38865466	SNV	Male	NM_001396	5splice	NA	NA
13895.p1	FBXW11	5	171326970	SNV	Female	NM_012300	nonsense	R170X	C508T
13896.p1	MUC21	6	30954871	Indel	Female	NM_001010909	frameshift	307-!	919+CGACCTCCAGTGGGGC
13900.p1	CHD8	14	21895989	Indel	Female	NM_020920	5splice	NA	NA
13905.p1	ANKRD11	16	89351042	Indel	Male	NM_001256182	frameshift	636-!	1908+AAACA
13913.p1	ZNF853	7	6661190	SNV	Female	NM_017560	nonsense	Q190X	C568T
13943.p1	NUDT4	12	93792632	Indel	Female	NM_019094	frameshift	NA	NA
13972.p1	REXO1	19	1818480	SNV	Female	NM_020695	5splice	NA	NA
13977.p1	CAPN8	1	223853218	Indel	Female	NM_001143962	frameshift	44-!	131+G
13982.p1	PARD3B	2	206480234	SNV	Female	NM_152526	nonsense	Y1043X	C3129G
14012.p1	BST2	19	17516098	SNV	Female	NM_004335	5splice	NA	NA
14016.p1	CHD8	14	21870169	SNV	Female	NM_001170629	nonsense	R1337X	C4009T
14021.p1	P2RX5	17	3591305	SNV	Female	NM_175080	5splice	NA	NA
14030.p1	NCKAP1	2	183866861	Indel	Female	NM_205842	frameshift	G175+!	525+TG
14068.p1	MYH2	17	10432099	SNV	Female	NM_017534	nonsense	R1218X	C3652T
14069.p1	KIAA1731	11	93463107	Indel	Female	NM_033395	frameshift	Q2547+!	7639+A
14070.p1	B4GALNT1	12	58025102	Indel	Female	NM_001276469	frameshift	L89+!	265+G
14075.p1	MEGF6	1	3519049	Indel	Female	NM_001409	frameshift	83-!	247+G
14086.p1	TOR1AIP2	1	179820223	Indel	Female	NM_001199260	frameshift	104-!	310+ACCTC
14107.p1	PLEKHO1	1	150129151	Indel	Male	NM_016274	frameshift	S122+!	365+GT
14114.p1	ANO9	11	428173	Indel	Female	NM_001012302	frameshift	E417+!	1250+A
14122.p1	NEDD9	6	11192635	Indel	Female	NM_001142393	frameshift	202-!	606+TGTTTTC
14133.p1	PHF3	6	64413433	Indel	Male	NM_015153	frameshift	1080-!	3239+CG
14136.p1	TANC2	17	61482569	SNV	Female	NM_025185	nonsense	R1066X	C3196T
14147.p1	STAM	10	17738824	Indel	Female	NM_003473	frameshift	260-!	779+T
14163.p1	TNRC6B	22	40662713	SNV	Female	NM_001162501	nonsense	Q827X	C2479T
14165.p1	SPAG9	17	49072429	Indel	Female	NM_001130528	frameshift	739-!	2215+TAGAT
14172.p1	SIK3	11	116766981	Indel	Female	NM_001281749	frameshift	F285+!	854+ATTT
14175.p1	ZWILCH	15	66838947	Indel	Female	NM_017975	frameshift	L569+!	1706+G
14189.p1	PNPLA7	9	140358800	SNV	Female	NM_001098537	nonsense	Q1050X	C3148T
14203.p1	CCDC87	11	66358293	SNV	Female	NM_018219	nonsense	E732X	G2194T
14204.p1	WAC	10	28899668	Indel	Male	NM_016628	frameshift	402-!	1206+ATTC
14210.p1	BNIP1	5	172571588	SNV	Female	NM_013980	nonsense	Q14X	C40T
14233.p1	CHD8	14	21859175	Indel	Female	NM_001170629	frameshift	N2372+!	7114+A
14248.p1	ELAVL2	9	23692707	Indel	Male	NM_004432	frameshift	310-!	928+CATCCGT
14256.p1	ANK2	4	114251469	SNV	Female	NM_001148	nonsense	R990X	C2968T
14257.p1	SCAMP2	15	75137487	Indel	Female	NM_005697	frameshift	309-!	927+T
14258.p1	RUNDC1	17	41139288	SNV	Female	NM_173079	nonsense	Q172X	C514T
14266.p1	TLK2	17	60655892	Indel	Female	NM_001284333	frameshift	437-!	1309+AT
14287.p1	GLTSCR2	19	48255802	Indel	Female	NM_015710	frameshift	235-!	703+CACC
14299.p1	KMT2E	7	104702706	Indel	Female	NM_018682	frameshift	56-!	167+C
14301.p1	RPAP1	15	41828848	SNV	Female	NM_015540	3splice	NA	NA
14307.p1	CYP27C1	2	127944869	Indel	Female	NM_001001665	frameshift	366-!	1097+G
14308.p1	ECE1	1	21584017	SNV	Female	NM_001113348	5splice	NA	NA
14310.p1	MORC3	21	37744772	Indel	Female	NM_015358	frameshift	870-!	2609+AG
14311.p1	ZNF490	19	12691751	Indel	Female	NM_020714	frameshift	H380+!	1139+TGAAGTG
14336.p1	RIPPLY1	X	106145431	SNV	Male	NM_138382	nonsense	W57X	G170A
14346.p1	CTCF	16	67650748	Indel	Male	NM_006565	frameshift	F351+!	1053+A
14393.p1	ARID1B	6	157510805	Indel	Male	NM_020732	frameshift	T1194+!	3580+C
14401.p1	UBAP2L	1	154227676	Indel	Female	NM_001287816	frameshift	I664+!	1991+C
14402.p1	YTHDC1	4	69195952	Indel	Female	NM_001031732	frameshift	400-!	1199+A
14405.p1	ARVCF	22	19965564	SNV	Female	NM_001670	nonsense	R539X	C1615T
14416.p1	MED13L	12	116424952	SNV	Female	NM_015335	nonsense	W1359X	G4076A
14441.p1	IFI44L	1	79093807	SNV	Female	NM_006820	nonsense	Y69X	T207A
14442.p1	BTBD9	6	38548004	SNV	Female	NM_052893	nonsense	R342X	C1024T
14463.p1	OLFM3	1	102271635	Indel	Female	NM_001288821	frameshift	252-!	756+ACAA
14473.p1	NXPE4	11	114441774	Indel	Female	NM_001077639	frameshift	507-!	1521+G
14474.p1	AKAP9	7	91726153	SNV	Female	NM_005751	nonsense	R3294X	C9880T
14477.p1	LRFN2	6	40400210	Indel	Female	NM_020737	frameshift	215-!	643+T
14486.p1	ZFHX3	16	72831723	Indel	Female	NM_006885	frameshift	H1620+!	4859+A
14490.p1	ADAMTS9	3	64547409	SNV	Female	NM_182920	nonsense	R1515X	C4543T
14491.p1	ZNF614	19	52519608	Indel	Female	NM_025040	frameshift	415-!	1243+TC
14530.p1	UNC79	14	94088799	Indel	Female	NM_020818	frameshift	1563-!	4689+C
14533.p1	GIGYF2	2	233675982	SNV	Female	NM_001103147	nonsense	Q664X	C1990T
14537.p1	FAM168B	2	131810589	SNV	Female	NM_001009993	3splice	NA	NA
14540.p1	TECTA	11	121060495	Indel	Female	NM_005422	frameshift	N2091+!	6273+GGAG
14559.p1	CHD1	5	98194693	Indel	Female	NM_001270	frameshift	N1518+!	4552+T
14563.p1	C10orf90	10	128193561	Indel	Female	NM_001004298	frameshift	L70+!	209+C
14575.p1	CCDC171	9	15784693	SNV	Female	NM_173550	5splice	NA	NA
14578.p1	DHX29	5	54563046	SNV	Female	NM_019030	nonsense	R1149X	C3445T
14581.p1	LIG3	17	33313013	Indel	Female	NM_013975	frameshift	185-!	554+T
14587.p1	LRRFIP1	2	238617256	Indel	Female	NM_001137550	frameshift	E56+!	166+A
14592.p1	SPDYC	11	64939990	SNV	Female	NM_001008778	nonsense	R144X	C430T
14596.p1	WDR33	2	128481973	Indel	Female	NM_018383	frameshift	377-!	1130+A
14597.p1	DSCAM	21	41457640	Indel	Female	NM_001389	frameshift	N1341+!	4022+TA
14604.p1	HOXD1	2	177054587	Indel	Female	NM_024501	frameshift	N235+!	704+T
14612.p1	TBL1XR1	3	176752047	Indel	Female	NM_024665	frameshift	397-!	1189+T
14613.p1	STARD10	11	72468902	SNV	Female	NM_006645	nonsense	R163X	C487T
14620.p1	TERF2	16	69404384	SNV	Female	NM_005652	5splice	NA	NA
14621.p1	ILF2	1	153637720	SNV	Male	NM_004515	nonsense	R185X	C553T
14631.p1	CASP8AP2	6	90581006	SNV	Female	NM_012115	3splice	NA	NA
14644.p1	UGT1A5	2	234676519	SNV	Female	NM_019078	nonsense	R342X	C1024T
14667.p1	RUNDC3B	7	87339897	SNV	Female	NM_138290	nonsense	W145X	G435A
Abbreviations: SNV = single nucleotide variation; Indel= mutations including insertions and deletions; LoF = loss of function; AA change= Amino acid change; BP change = base paire nucleotide change
